# Supplementary material for: A fast-response electrochromic device based on a composite gel film comprising triphenylamine derivatives and WO3
Source: Royal Society of Chemistry journal article supplement (doi:10.1039/d1nj00113b), 2021-01-01
Supplement: d1nj00113b1.pdf [file d1nj00113b1.pdf]

## Supporting Information

### **A fast-response electrochromic device based on a composite gel film comprising triphenylamine derivatives and WO<sub>3</sub>**

Xuejian Zhang <sup>a</sup>, Jinming Zeng <sup>b</sup>, Zipeng Xu <sup>a</sup>, Mimi Zhu <sup>a</sup>, Ping Liu\*<sup>a</sup>

<sup>a</sup> State Key Laboratory of Luminescent Materials and Devices, Research Institute of Materials Science, South China University of Technology, Guangzhou 510640, China.

E-mail address: [mcpliu@scut.edu.cn](mailto:mcpliu@scut.edu.cn)

<sup>b</sup> Engineering Research Center for Hydrogen Energy Materials and Devices, Faculty of Materials Metallurgy and Chemistry, Jiangxi University of Science and Technology, 86 Hong Qi Road, Jiangxi 341000, China

# 1. Nuclear magnetic resonance spectrums of TPB, TPB-2CHO and TPB-PSSO

(1)  $^1\text{H}$  NMR and  $^{13}\text{C}$  NMR spectra of TPB

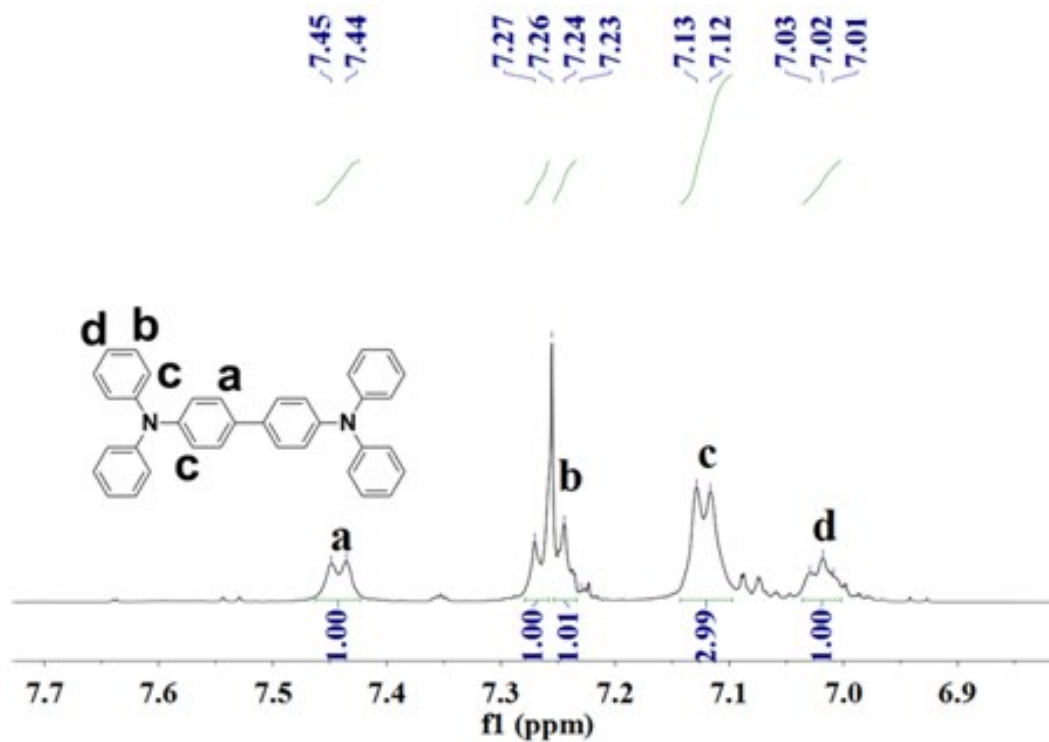

Fig. S1.  $^1\text{H}$  NMR spectrum of TPB.

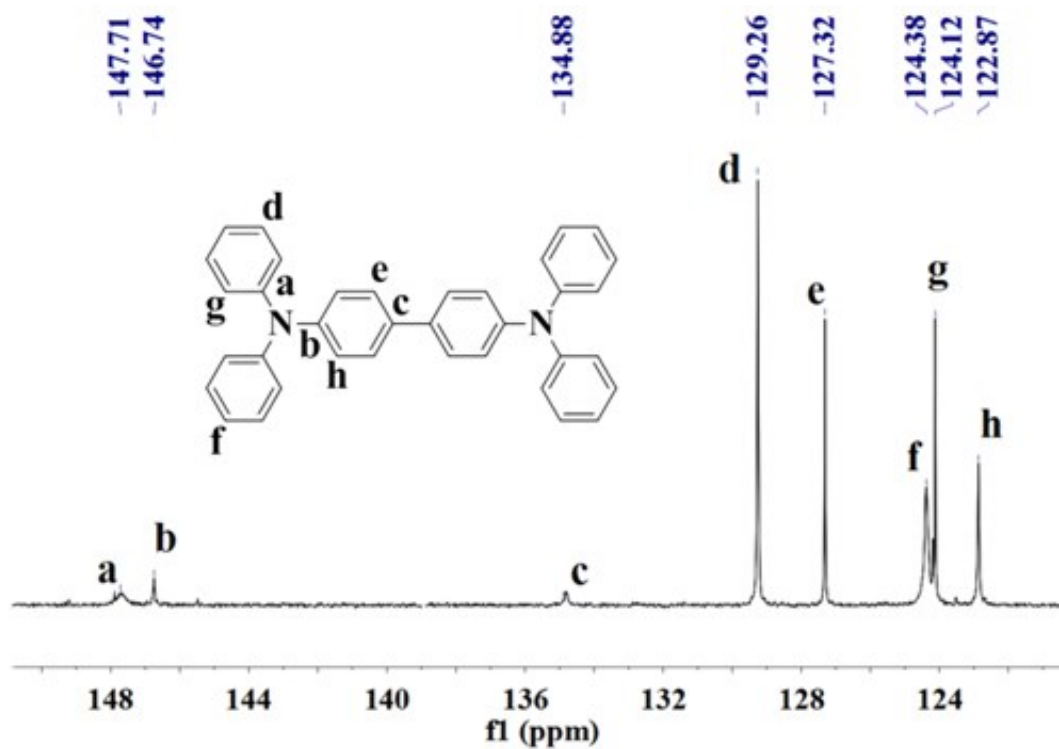

Fig. S2.  $^{13}\text{C}$  NMR spectrum of TPB.

(2)  $^1\text{H}$  NMR and  $^{13}\text{C}$  NMR spectra of TPB-2CHO

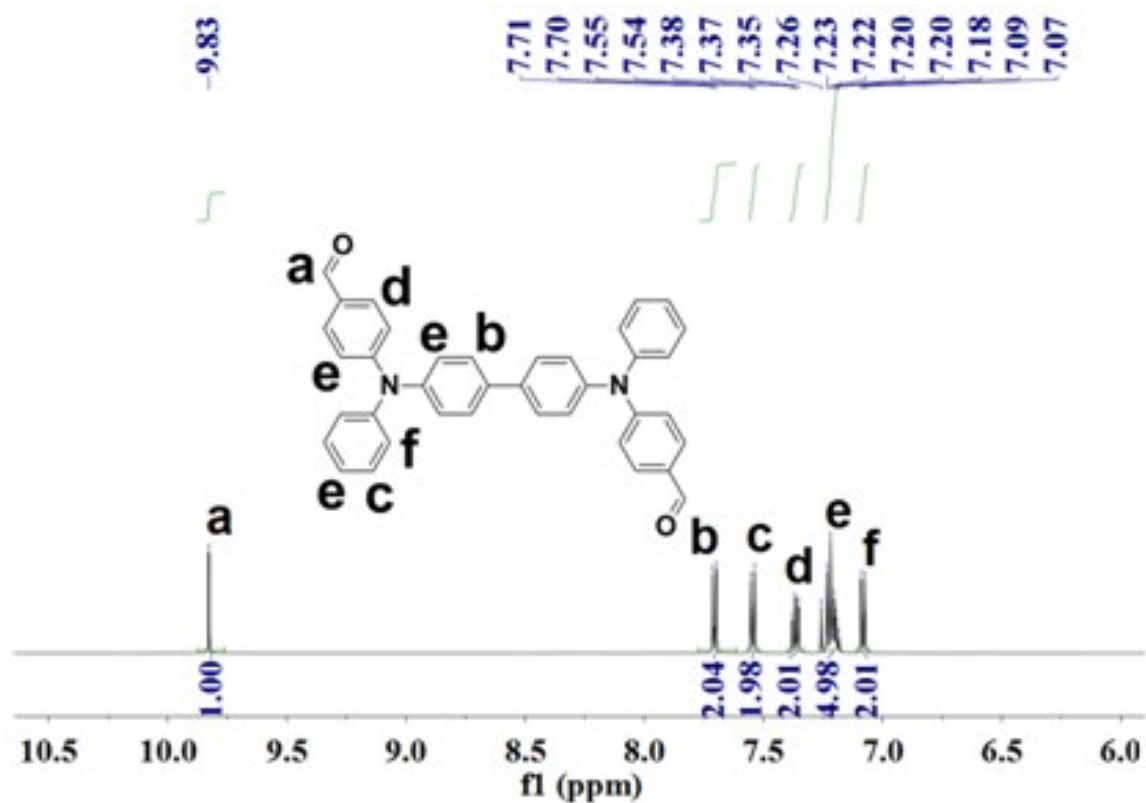

Fig. S3.  $^1\text{H}$  NMR spectrum of TPB-2CHO.

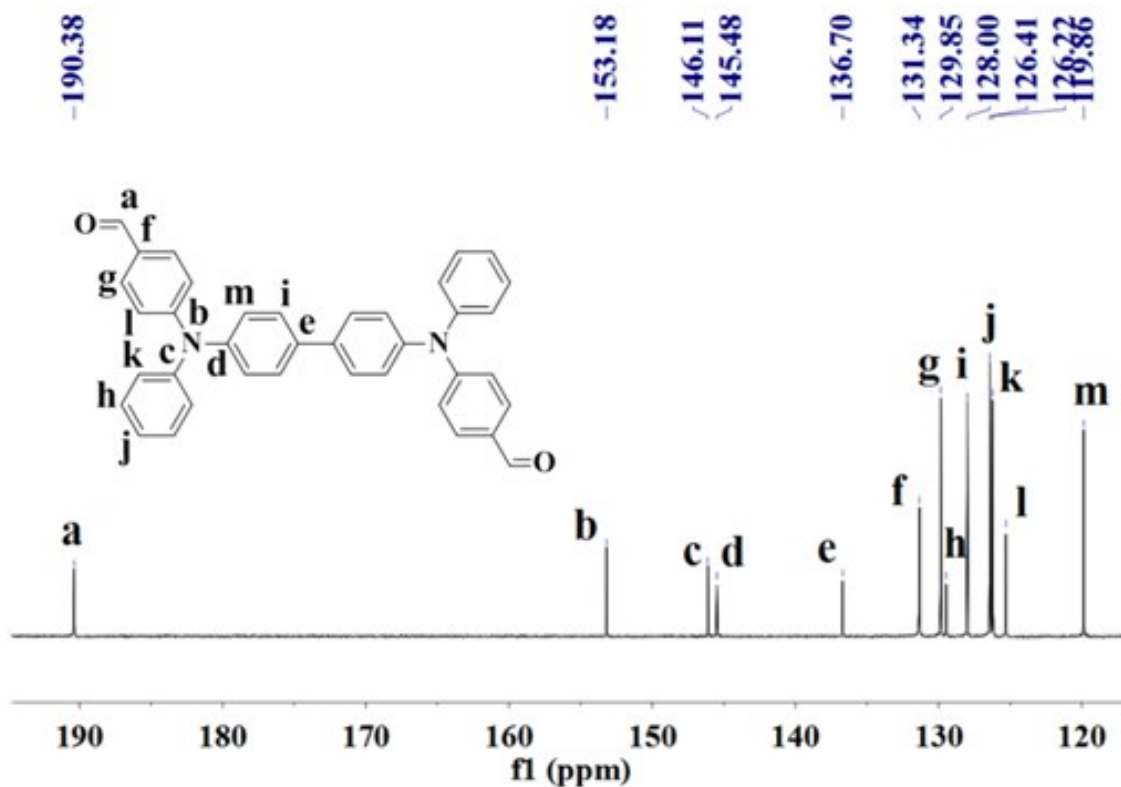

**Fig. S4.**  $^{13}\text{C}$  NMR spectrum of TPB-2CHO.

(3)  $^1\text{H}$  NMR and  $^{13}\text{C}$  NMR spectra of TPB-PSSO

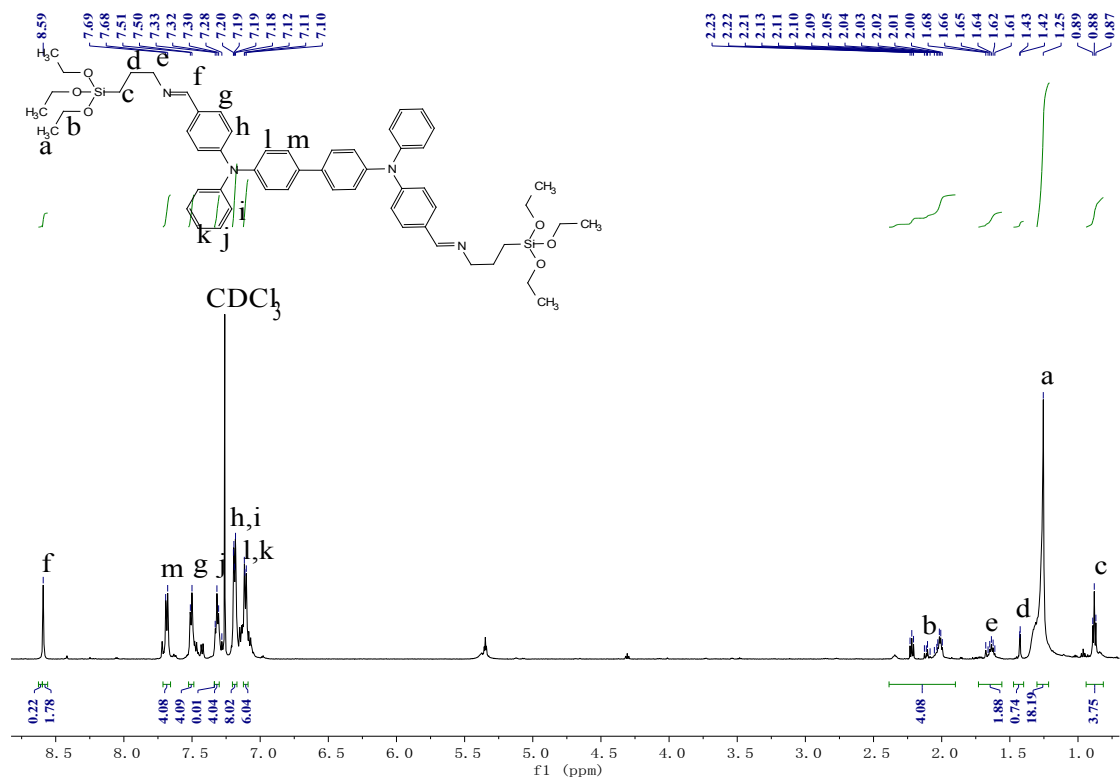

**Fig. S5.**  $^1\text{H}$  NMR spectrum of TPB-PSSO.

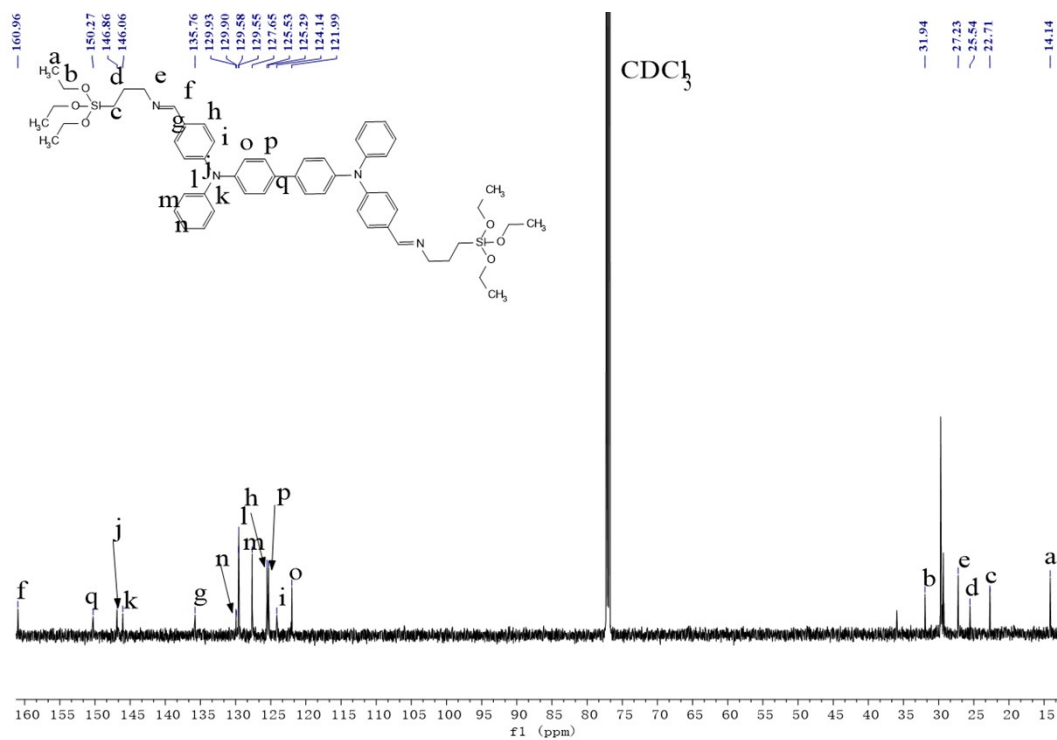

**Fig. S6.**  $^{13}\text{C}$  NMR spectrum of TPB-PSSO.

## 2. Fourier transform infrared spectra of TPB-PSSO

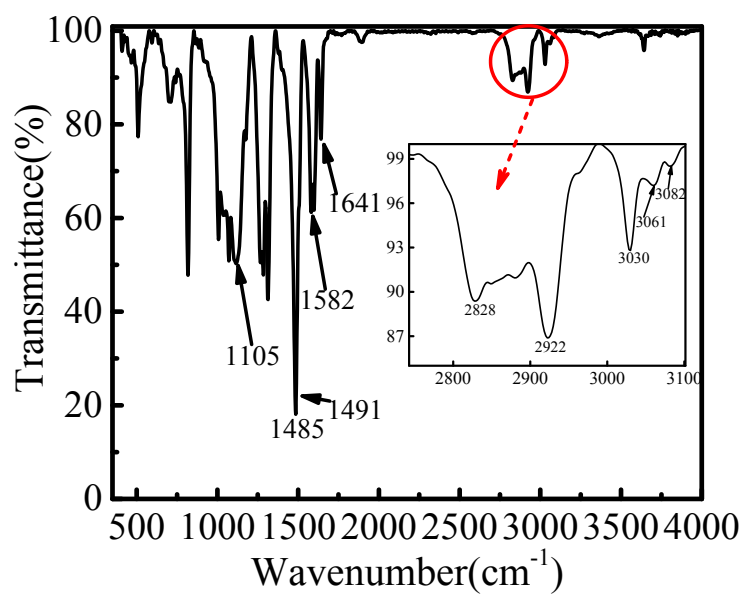

**Fig. S7.** FTIR spectra of TPB-PSSO.

## 3. Thermogravimetric analysis curve of TPB-PSSO

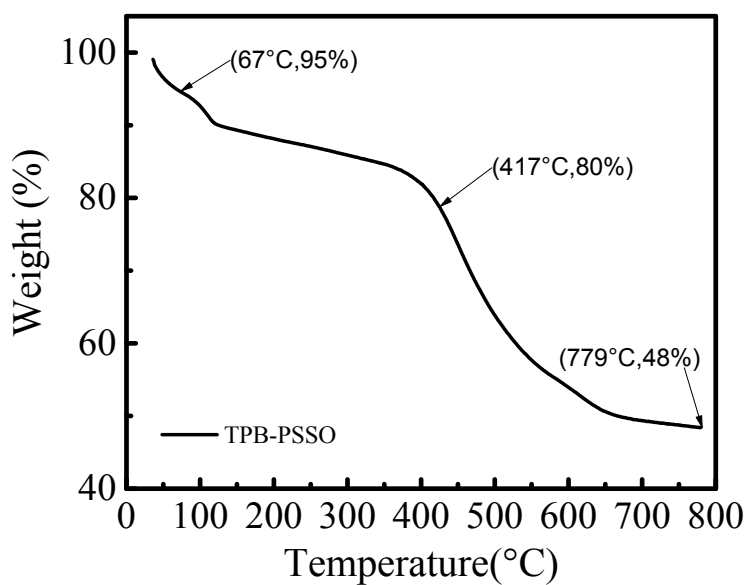

Fig. S8. TGA curve of TPB-PSSO from room temperature to 800 °C.

#### 4. Optoelectrochemical properties of TPB-PSSO

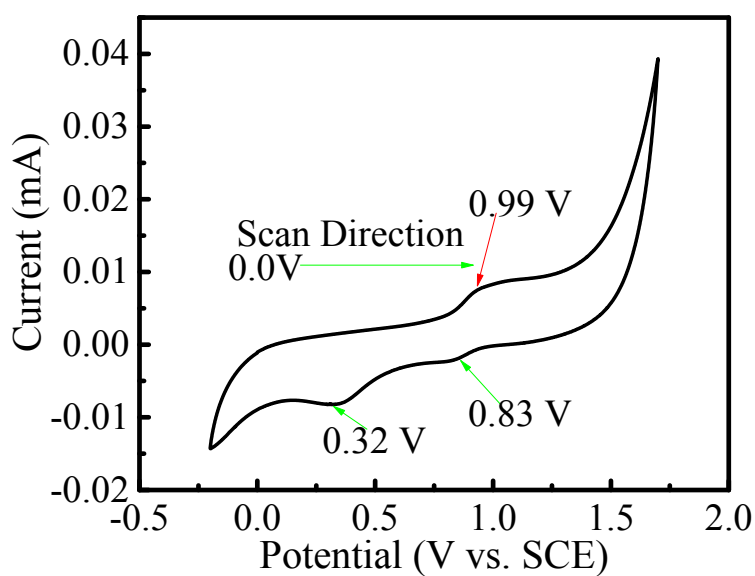

Fig. S9. Cyclic voltammograms of TPB-PSSO in PC solution containing 0.1 M  $\text{LiClO}_4$  at a scan rate of 50 mV/s.

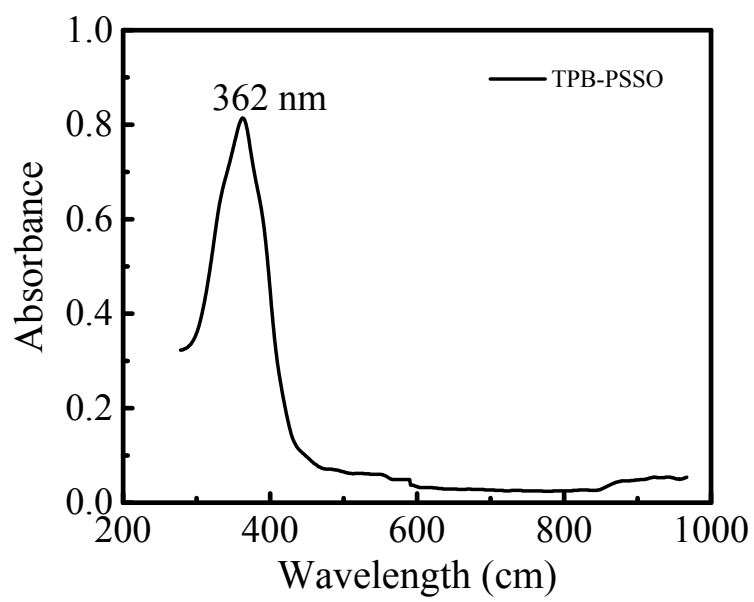

**Fig. S9. Electronic absorption spectra of TPB-PSSO in PC solutions**
